# Supplementary material for: Short Interpregnancy Interval Following a Multifetal Pregnancy: Maternal and Neonatal Outcomes
Source: MDPI journal article supplement (doi:10.3390/jcm12072576), 2023-03-29
Supplement: s1 [file s1]

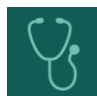

**Table S1.** Baseline maternal, labor and delivery characteristics of the different IPI groups as compared to women with optimal IPI (reference group).

|                                                | Optimal IPI -18-48 months<br>(n=1142) | IPI 7-17 months<br>(n=825) | <i>p</i><br>value | IPI >49 months<br>(n=387) | <i>p</i><br>value |
|------------------------------------------------|---------------------------------------|----------------------------|-------------------|---------------------------|-------------------|
| Maternal age <sup>a</sup>                      | 32.1±4.6                              | 29.9±5.2                   | <0.01             | 34.8±4.3                  | <0.01             |
| Previous miscarriages                          | 301 (27.3%)                           | 239 (31.7%)                | 0.04              | 91 (23.7%)                | 0.17              |
| Previous miscarriages≥3                        | 34 (3.1%)                             | 26 (3.4%)                  | 0.67              | 7 (1.8%)                  | 0.19              |
| Gravidity                                      | 4.4±2.5                               | 4.5±2.8                    | 0.51              | 3.9±2                     | <0.01             |
| Parity                                         | 4±2.2                                 | 4±2.5                      | 0.87              | 3.6±1.7                   | <0.01             |
| Interpregnancy pregnancy interval <sup>b</sup> | 29.9±8.4                              | 12.2±3.3                   | <0.01             | 66.7±18.4                 | <0.01             |
| Smoking                                        | 21 (2%)                               | 13 (1.8%)                  | 0.79              | 14 (3.9%)                 | 0.05              |
| Previous cesarean delivery                     | 588 (51.5%)                           | 387 (46.9%)                | 0.05              | 216 (55.8%)               | 0.14              |
| Previous cesarean delivery in twin pregnancy   | 576 (51.3%)                           | 380 (46.7%)                | 0.19              | 208 (54.8%)               | 0.23              |
| Fertility Treatments                           | 118 (10.7%)                           | 42 (5.6%)                  | <0.01             | 76 (19.8%)                | <0.01             |
| Hypertensive disorders of pregnancy            | 14 (1.3%)                             | 8 (1.1%)                   | 0.68              | 13 (3.4%)                 | 0.01              |
| Diabetes <sup>c</sup>                          | 62 (5.7%)                             | 24 (3.2%)                  | 0.01              | 31 (8.2%)                 | 0.08              |
| Obesity (BMI>30)                               | 52 (17.7%)                            | 34 (17.8%)                 | 0.99              | 35 (31.8%)                | <0.01             |
| Trial of labor after cesarean                  | 390 (35.4%)                           | 299 (39.6%)                | 0.06              | 50 (14.2%)                | <0.01             |
| Induction of labor                             | 94 (8.9%)                             | 72 (9.1%)                  | 0.84              | 109 (28.4%)               | 0.01              |
| Meconium-stained amniotic fluid                | 144 (13.1%)                           | 140 (18.5%)                | <0.01             | 53 (13.8%)                | 0.71              |
| Epidural analgesia                             | 543 (48%)                             | 414 (51.3%)                | 0.15              | 186 (48.4%)               | 0.89              |

Data are mean± standard deviation; number (%); BMI Body Mass Index. a-years, b-months, c- pre-gestational + gestational.

**Table S2.** Maternal outcomes of the different IPI groups as compared to women with optimal IPI (reference group).

|                                         | Optimal IPI -18-48 months<br>(n=1142) | IPI 7-17 months<br>(n=825) | <i>p</i><br>value | IPI >49 months<br>(n=387) | <i>p</i><br>value |
|-----------------------------------------|---------------------------------------|----------------------------|-------------------|---------------------------|-------------------|
| Gestational age at delivery             | 39.2±1.6                              | 39.4±1.6                   | 0.02              | 38.8±2                    | <0.01             |
| Gestational age at delivery<37 week     | 47 (4.3%)                             | 31 (4.1%)                  | 0.87              | 24 (6.3%)                 | 0.12              |
| Gestational age at delivery<34week      | 8 (0.7%)                              | 6 (0.7%)                   | 0.94              | 5 (1.3%)                  | 0.27              |
| Gestational age at delivery<32week      | 3 (0.3%)                              | 4 (0.5%)                   | 0.41              | 3 (0.8%)                  | 0.16              |
| Gestational age at delivery<28week      | 1 (0.1%)                              | 1 (0.1%)                   | 0.82              | 2 (0.5%)                  | 0.10              |
| Spontaneous preterm birth (<37 weeks)   | 29 (2.6%)                             | 19 (2.5%)                  | 0.87              | 9 (2.3%)                  | 0.76              |
| Indicated preterm birth (<37 weeks)     | 18 (1.6%)                             | 12 (1.6%)                  | 0.94              | 15 (3.9%)                 | 0.01              |
| Prolonged hospital stays, mother        | 16 (2%)                               | 7 (1.3%)                   | 0.30              | 6 (2.2%)                  | 0.85              |
| Placenta Accreta/Percreta               | 1 (0.1%)                              | 1 (0.2%)                   | 0.80              | 0 (0%)                    | 0.56              |
| Maternal ICU admissions                 | 1 (0.1%)                              | 0 (0%)                     | 0.40              | 0 (0%)                    | 0.56              |
| Postpartum hemorrhage                   | 81 (7.4%)                             | 47 (6.3%)                  | 0.37              | 36 (9.4%)                 | 0.21              |
| Placental abruption                     | 23 (2.1%)                             | 15 (2%)                    | 0.90              | 7 (1.8%)                  | 0.75              |
| Blood products transfusion              | 15 (1.9%)                             | 10 (1.8%)                  | 0.92              | 3 (1.1%)                  | 0.38              |
| In labor cesarean                       | 65 (5.9%)                             | 48 (6.4%)                  | 0.68              | 38 (9.9%)                 | 0.01              |
| Elective cesarean                       | 189 (17.2%)                           | 77 (10.2%)                 | <0.01             | 85 (22.1%)                | 0.03              |
| Anemia (Hb<11gr%) on admission to labor | 91 (11.4%)                            | 87 (15.8%)                 | 0.02              | 37 (13.6%)                | 0.36              |

Data are mean± standard deviation; number (%); IPI Interpregnancy interval; ICU Intensive care unit; N/A Non applicable.

**Table S3.** Neonatal outcomes of the different IPI groups as compared to women with optimal IPI (reference group).

|                                           | Optimal IPI -18-48 months<br>( <i>n</i> =1142) | IPI 7-17 months<br>( <i>n</i> =825) | <i>p</i> value | IPI >49 months<br>( <i>n</i> =387) | <i>p</i> value |
|-------------------------------------------|------------------------------------------------|-------------------------------------|----------------|------------------------------------|----------------|
| <b>Birthweight</b>                        | 3361.5±490.5                                   | 3374.4±505.2                        | 0.57           | 3241.2±519.7                       | <0.01          |
| <b>Birthweight &gt;4000 grams</b>         | 83 (7.5%)                                      | 64 (8.5%)                           | 0.46           | 25 (6.5%)                          | 0.50           |
| <b>Large for gestational age</b>          | 164 (14.9%)                                    | 108 (14.3%)                         | 0.75           | 47 (12.3%)                         | 0.21           |
| <b>Small for gestational age</b>          | 94 (8.5%)                                      | 69 (9.2%)                           | 0.64           | 29 (7.6%)                          | 0.56           |
| <b>5-Minute Apgar score &lt; 7</b>        | 13 (1.1%)                                      | 8 (1%)                              | 0.72           | 9 (2.3%)                           | 0.09           |
| <b>Perinatal death</b>                    | 2 (0.2%)                                       | 5 (0.6%)                            | 0.11           | 1 (0.3%)                           | 0.75           |
| <b>NICU admission</b>                     | 34 (3.1%)                                      | 18 (2.4%)                           | 0.37           | 23 (6%)                            | 0.01           |
| <b>Composite adverse neonatal outcome</b> | 252 (22.1%)                                    | 154 (18.7%)                         | 0.07           | 98 (25.3%)                         | 0.19           |

Data are mean± standard deviation; number (%); IPI Interpregnancy interval, NICU Neonatal intensive care unit, TTN transient tachypnea of the newborn; N/A Non applicable.
